# Supplementary material for: Ionic liquids and fragrances – direct isolation of orange essential oil
Source: Royal Society of Chemistry journal article supplement (doi:10.1039/c1gc15237h), 2011-01-01

## Supporting Information

### Ionic liquids and fragrances – Direct isolation of orange essential oil

Katharina Bica,<sup>a,\*</sup> Peter Gaertner,<sup>a</sup> and Robin D. Rogers<sup>b,\*</sup>

<sup>a</sup>*Institute of Applied Synthetic Chemistry, Vienna University of Technology,  
Getreidemarkt 9/163, Vienna, Austria.*

*Fax: +43 1 58801 16399; Tel: +43 1 58801 163601;*

*E-mail: [kbica@ioc.tuwien.ac.at](mailto:kbica@ioc.tuwien.ac.at)*

<sup>b</sup>*Department of Chemistry and Center for Green Manufacturing, The University of Alabama,  
Tuscaloosa, AL 35487, USA.*

*Fax: +1 205 348 0823; Tel: +1 205 348 4323;*

*Email: [rdrogers@as.ua.edu](mailto:rdrogers@as.ua.edu)*

#### 1. General

All chemicals unless otherwise stated were purchased from commercial suppliers and used without further purification. *N*-Methylimidazole was distilled from KOH prior to use. Ionic liquids **1** and **2** were prepared according to literature procedures, and analytical data were in accordance with literature.<sup>1,2</sup> [C<sub>2</sub>mim]OAc **3** was purchased from Iolitec (Heilbronn, Germany) in >95% purity. All ionic liquids were dried for 24 h at 80 °C and 0.01 mbar with stirring before use and were stored under argon.

<sup>1</sup>H and <sup>13</sup>C NMR spectra were recorded on a Bruker AC 200 at 200 and 50 MHz, resp., using the solvent peak as reference.

GC–MS analyses were conducted on a VOYAGER Quadrupol (Thermo Finnigan) directly interfaced to a GC 8000 TOP gas chromatograph using a BGB-5 (30 m × 0.32 mm i.d., 1.0 μm film thickness) cross-bonded dimethyl polysiloxane capillary column. The oven temperature program was 40 °C (3 min)//10 °C/min//280 °C (3 min). Source and transfer line temperatures were set at 200 and 280 °C, resp.

#### 2. Experimental Procedure

<sup>1</sup> J. Dupont, C. S. Consorti, P. A. Z. Suarez and R. F. de Souza, *Org. Synth.* 2003, **79**, 236.

<sup>2</sup> H. Zhang, J. Wu, J. Zhang and J. He, *Macromolecules* 2005, **38**, 8272.

**Dissolution:** A 100 mL round-bottom flask is charged with 35 g of [C<sub>4</sub>mim]OAc **3** and dried under high vacuum (0.1 mbar, 50 °C) with stirring for 30 min. 15 g orange peel in pieces (finely grated on a conventional kitchen rasp) were added, and the flask sealed with a stopper and secured with a clamp. The mixture was stirred for 1 h at 60 °C (oil bath temperature) with efficient stirring until the biomass was mostly dissolved.

**Isolation of Essential Oil:** The crude mass was subjected to a Kugelrohr oven and a mixture of water and limonene was distilled at ~ 60-65 °C and 12/15 mbar (efficient cooling with ice/NaCl was required). The distillate was separated between water and dichloromethane, the organic layer dried over Na<sub>2</sub>SO<sub>4</sub>, filtered, and the solvent removed under reduced pressure.

**Recovery of Ionic Liquid:** The remaining residue after dissolution was diluted with 200 mL of H<sub>2</sub>O to precipitate the biopolymers. The suspension was filtered over silica, and the filtrate evaporated. The remaining volatiles were removed under reduced pressure (0.1 mbar, stirring, 80 °C) to give [C<sub>4</sub>mim]OAc **3** as a dark brown liquid in quantitative yield. The obtained ionic liquid was pure according to <sup>1</sup>H NMR spectroscopy. For further purification, the ionic liquid was re-dissolved in 100 mL of H<sub>2</sub>O and refluxed with an excess of charcoal for 2 h. The suspension was filtered over silica, and the filtrate evaporated. The remaining volatiles were removed under reduced pressure (0.1 mbar, stirring, 80 °C) to give [C<sub>4</sub>mim]OAc **3** as a colourless liquid in 90% yield.

**Fig. S1. GC-MS chromatogram of isolated orange oil**

RT: 0.00 - 30.01

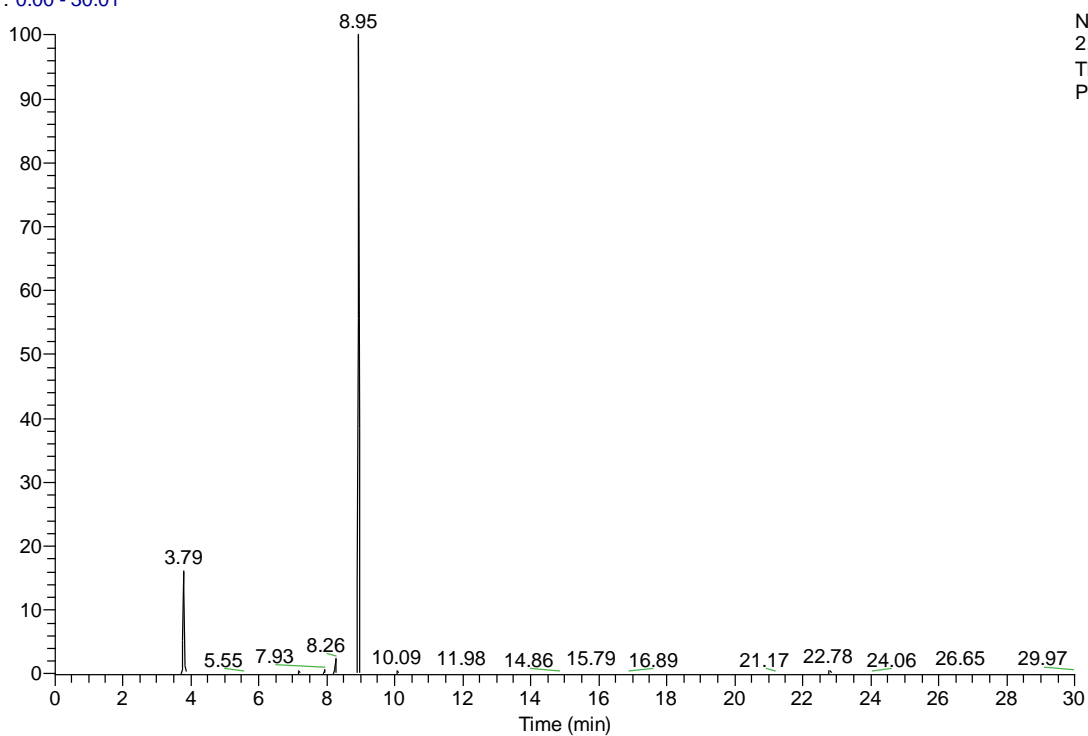

NL:  
2.91E9  
TIC MS  
PG16

PG16 #342 RT: 8.95 AV: 1 NL: 4.63E8

T: + c Full ms [50.00-650.00]

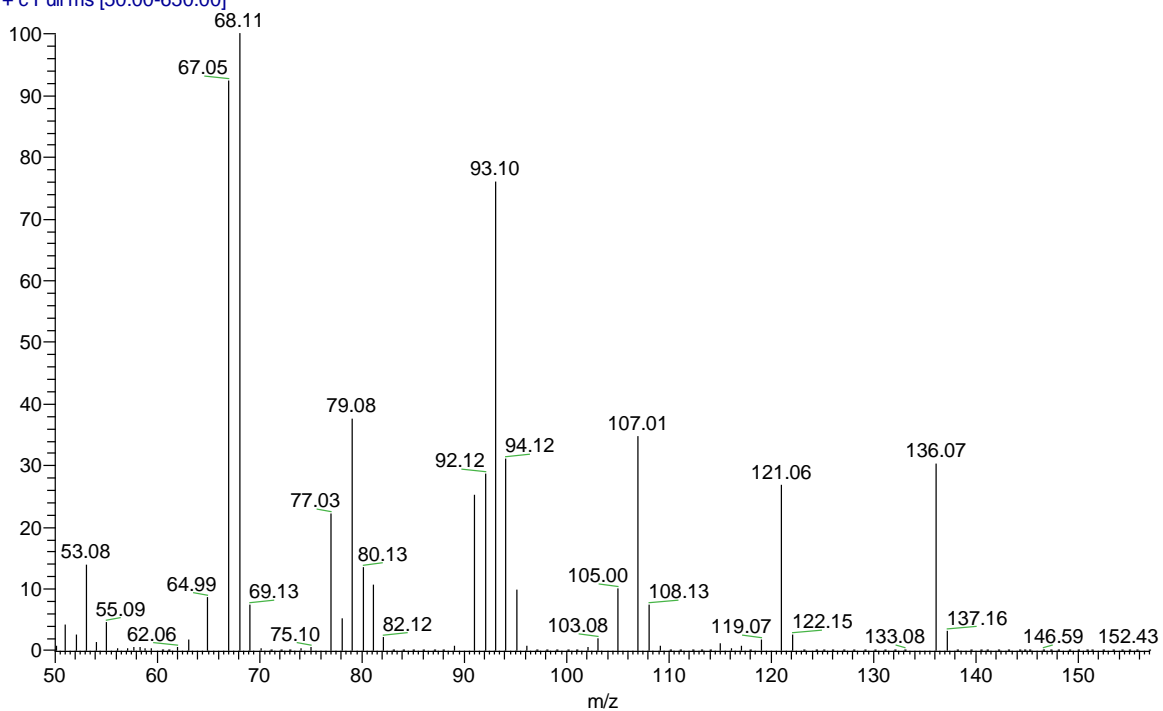

Fig. S2. NMR spectra of pure and recovered ionic liquid  $[\text{C}_2\text{mim}]\text{OAc}$  3

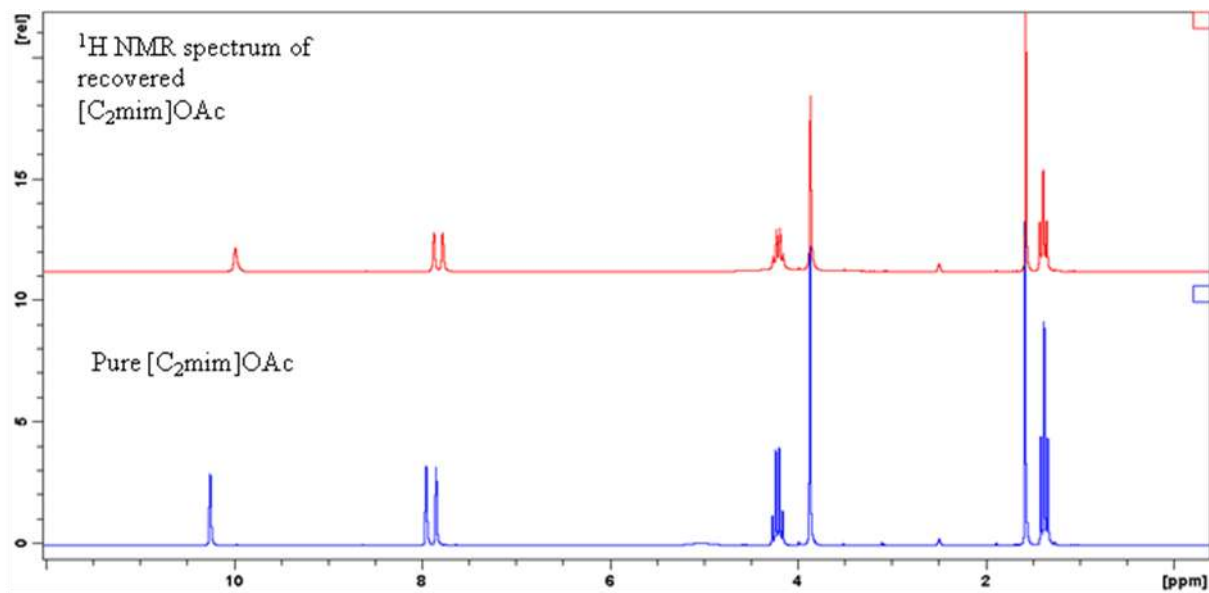

Supplement: c1gc15237h.pdf [file c1gc15237h.pdf]
